# Supplementary material
Source: publisher figshare collection journal article supplement (https://geolsoc.figshare.com/ndownloader/files/22475870)
Supplement: Supplementary file 1 [file 22475870]

## Sheet: Sheet1
sepiolite	AT11					AT15						AT18															AT20													AT21
SiO2	50.341	48.618	48.013	48.536		50.2	49.651	50.485	52.872	49.651		51.359	51.38	50.395	49.431	51.893	50.46	48.718	49.18	45.195	45.581	45.333	42.33	42.562	45.907		49.229	46.285	48.999	47.957	49.758	49.269	48.748	50.606	49.465	50.254	48.102	48.806		49.093	49.103	50.79	48.938	50.181	48.369	49.045	46.753	48.974	47.764
TiO2	0.007	0.071	0.07	0.044		0	0	0.004	0	0		0.007	0	0.037	0.048	0	0	0	0	0	0.069	0	0.084	0	0.094		0	0.065	0.069	0	0.019	0	0	0	0.038	0.004	0.093	0		0.099	0	0	0	0.084	0	0	0.004	0.023	0.034
Al2O3	0.021	0.037	0.092	0.053		0.025	0.439	0.035	0.935	0.439		0.779	0.088	0.207	2.985	2.455	1.751	3.132	1.777	1.33	2.079	0.714	1.581	0.925	8.132		0.061	0.479	0.345	0.225	0.09	0.066	0.031	0.049	0.074	0.405	0.56	0.044		0.683	0.051	0.022	0.621	0.002	0.023	0.015	0.031	0.033	0.02
Cr2O3	0	0.048	0.073	0.087		0.04	0	0	0.012	0		0	0	0	0	0	0.007	0	0.045	0	0.046	0.057	0	0	0.03		0	0.007	0	0.097	0.049	0.041	0.019	0.009	0	0	0.02	0.046		0	0.012	0.022	0.003	0	0.022	0.067	0.003	0.019	0.026
FeO	4.187	4.579	5.792	3.913		2.292	3.904	3.82	3.878	3.904		4.31	4.227	3.431	8.365	6.943	5.994	8.178	3.457	5.014	6.645	5.031	4.795	5.799	12.353		6.068	6.863	6.077	6.923	7.832	7.361	5.585	6.66	6.929	6.114	6.588	6.289		5.512	7.384	7.735	7.535	5.001	5.634	4.437	5.811	6.78	6.198
MnO	0.019	0.066	0.057	0.037		0.069	0.033	0	0.019	0.033		0.064	0.059	0.035	0.115	0	0	0.144	0.047	0.048	0.063	0	0.087	0.033	0.067		0	0.091	0.02	0.007	0.048	0.028	0.03	0.017	0.047	0.043	0.001	0.035		0.007	0.018	0	0.091	0	0	0.018	0.04	0.128	0.046
MgO	32.082	33.369	32.479	33.174		35.09	33.647	32.484	31.152	33.647		31.375	30.447	33.812	27.828	28.386	30.272	28.905	32.558	34.082	32.129	34.999	36.962	34.967	22.912		32.213	31.761	31.484	30.812	29.704	30.702	33.353	33.154	30.316	31.483	31.849	30.13		30.101	29.871	26.556	27.554	29.276	31.875	32.6	33.764	31.313	32.21
CaO	0.183	0.182	0.151	0.18		0.165	0.293	0.294	0.095	0.293		0.258	0.292	0.192	0.797	0.696	0.519	0.09	0.256	0.141	0.465	0.1	0.042	0.07	1.23		0.24	0.523	0.196	0.164	0.389	0.297	0.09	0.115	0.364	0.199	0.234	0.235		0.275	0.396	0.31	0.706	0.38	0.201	0.23	0.076	0.116	0.25
Na2O	0.039	0	0.008	0.013		0.011	0.003	0	0.007	0.003		0.051	0	0.01	0.029	0.055	0	0.033	0.015	0.01	0.018	0.015	0	0	0.008		0.041	0	0.089	0.068	0.093	0.025	0.014	0.05	0.023	0.025	0.002	0.168		0	0.045	0.052	0.071	0.045	0.01	0.041	0.004	0.073	0.016
K2O	0.026	0.009	0.007	0.03		0.015	0.001	0.006	0.004	0.001		0.029	0.03	0.012	0.019	0.033	0.007	0.003	0.027	0.006	0.016	0	0	0	0.026		0	0.013	0.021	0.013	0.016	0.021	0.01	0.007	0.023	0.007	0.001	0.02		0.026	0.027	0.023	0.023	0.017	0.01	0.018	0.015	0.018	0.003
P2O5	0	0	0	0		0	0	0	0	0		0	0.007	0	0	0	0	0	0	0	0	0	0	0.003	0		0	0.309	0	0	0	0	0	0	0	0	0	0		0	0	0	0	0	0	0	0	0	0
F	0	0	0.01	0		0.139	0	0.011	0.095	0		0.011	0	0	0	0.021	0	0	0	0.021	0	0	0.051		0		0.01	0.01	0	0	0.125	0	0	0	0	0	0	0		0	0	0	0.052	0	0.052	0.095	0.083	0	0.01
Cl	0.04	0.003	0.024	0.041		0.011	0.013	0.038	0.009	0.013		0.061	0.027	0.03	0.006	0.011	0.01	0.009	0.063	0.006	0.025	0.017	0.022		0.01		0.043	0.03	0.063	0.053	0.055	0.051	0.007	0.024	0.061	0.007	0.02	0.033		0.035	0.047	0.057	0.044	0.061	0.023	0.043	0.008	0.015	0.013
SO3	0	0	0.038	0		0.005	0.009	0.014	0.006	0.009		0	0.008	0.001	0.022	0.016	0.006	0.001	0.003	0	0.021	0	0.02		0.009		0.009	0	0.016	0	0.015	0.001	0.013	0.024	0.019	0.011	0	0.01		0.018	0.004	0.007	0.009	0	0.004	0	0.007	0	0
Total	87.233	87.165	86.937	86.099		88.053	88.091	87.22	89.198	88.091		88.55	86.579	88.21	89.671	90.511	89.024	89.211	87.424	85.843	87.151	86.32	85.993	84.39	90.776		87.934	86.425	87.371	86.307	88.141	87.85	87.898	90.73	87.361	88.595	87.491	85.891		85.841	86.947	85.561	85.615	85.043	86.21	86.583	86.562	87.523	86.604
[truncated: 19 more columns]
